# Supplementary material for: Tropaeolum majus R2R3 MYB Transcription Factor TmPAP2 Functions as a Positive Regulator of Anthocyanin Biosynthesis
Source: MDPI journal article supplement (doi:10.3390/ijms232012395), 2022-10-17
Supplement: s1 [file s1]

**Table S2** Nasturtium gene primers used in this study

| Primer Name         | Sequence                                 |
|---------------------|------------------------------------------|
| <i>TmPAP1-Nde1F</i> | 5'- CAACATATGGAAAACACTACTCGGTAGG -3'     |
| <i>TmPAP1-Sac1R</i> | 5'- CAAGAGCTCAAATACCAACATTATCTTC -3'     |
| <i>TmPAP2-Nde1F</i> | 5'- CAACATATGGAAAGCTGCTTGGTAGG -3'       |
| <i>TmPAP2-Sac1R</i> | 5'- CAAGAGCTCAATCTAAATCATCATTTAAG -3'    |
| <i>TmGL3-Nde1F</i>  | 5'- CAACATATGAGCAAGCTAATCGACGA -3'       |
| <i>TmGL3-Sac1R</i>  | 5'- CAAGAGCTCAAGAATTCCAAGCAACTCTTTG -3'  |
| <i>TmTTG1-Nde1F</i> | 5'- CAACATATGGAGAATTCAACCCAAGAATC -3'    |
| <i>TmTTG1-Sac1R</i> | 5'- CAAGAGCTCAAACCTTCAATAGCTGCATCTTG -3' |
| <i>TmACT2-F</i>     | 5'- GTTGGGATGGGCCAAAAGGA -3'             |
| <i>TmACT2-R</i>     | 5'- CGACCACTGGCATAAAGGGA -3'             |
| <i>TmC4H-RTF</i>    | 5'- ACTACTGGCACGAACAACGAA -3'            |
| <i>TmC4H-RTR</i>    | 5'- ATACCAAGAATAGGCAACGCA -3'            |
| <i>TmCHS-RTF</i>    | 5'- GTGTCCTCGTCGTTTGCTCC -3'             |
| <i>TmCHS-RTR</i>    | 5'- CACCCAATCCAACCCTTCA -3'              |
| <i>TmCHI-Nde1F</i>  | 5'- CAACATATGGCAACGTCACCGTCACCGTC -3'    |
| <i>TmCHI-Sac1R</i>  | 5'- CAAGAGCTCAAGCAGTTACTTTTCCG -3'       |
| <i>TmDFR-Nde1F</i>  | 5'- CAACATATGGATTTTCGAGTCTAAAGATC -3'    |
| <i>TmDFR-Sac1R</i>  | 5'- CAAGAGCTCAAACATTGATCTCCTC -3'        |
| <i>TmANS-RTF</i>    | 5'- CCAACTTCTTCACCACAAG -3'              |
| <i>TmANS-RTR</i>    | 5'- CTCCAAACAGTCTCCAATG -3'              |
| <i>TmUF3GT-RTF</i>  | 5'- ATCTCATTACCTTCATCCCCA -3'            |
| <i>TmUF3GT-RTR</i>  | 5'- AAAACTGACCTTCAATCTCCC -3'            |
